# Supplementary material for: MiR-650 represses high-risk non-metastatic colorectal cancer progression via inhibition of AKT2/GSK3β/E-cadherin pathway
Source: PubMed Central journal article supplement (PMC5564786; doi:10.18632/oncotarget.17743), 2017-05-10
Supplement: oncotarget-08-49534-s001.pdf [file oncotarget-08-49534-s001.pdf]

## MiR-650 represses high-risk non-metastatic colorectal cancer progression via inhibition of AKT2/GSK3 $\beta$ /E-cadherin pathway

### Supplementary Materials

**Supplementary Table 1: Candidate miRNA biomarkers in CRC tissues among patients with different prognosis by miRNA microarray**

| microRNA        | P. Value | Fold Change (Poor/Good) |
|-----------------|----------|-------------------------|
| hsa-miR-650     | 0.050    | 0.3                     |
| hsa-miR-146a    | 0.027    | 0.4                     |
| hsa-miR-365     | 0.030    | 0.5                     |
| hsa-miR-125a-5p | 0.029    | 2.6                     |
| hsa-let-7e      | 0.033    | 2.7                     |

**Supplementary Table 2: The potential targets of miR-650**

|                                 |                                   |
|---------------------------------|-----------------------------------|
| Position 174-181 of AKT2 3' UTR | 5'...GGCCCCUGCAGCCCCUGCCUCCA...   |
| hsa-miR-650                     | 3' CAGGACUCUCGCGACGGAGGA<br>      |
| Position 182-188 of AKT2 3' UTR | 5'...CAGCCCCUGCCUCCAGCCUCCAG...   |
| hsa-miR-650                     | 3' CAGGACUCUCGCGACGGAGGA<br>      |
| Position 358-364 of AKT2 3' UTR | 5'...UGUCGUGCUGGUGUCUGCCUCCG...   |
| hsa-miR-650                     | 3' CAGGACUCUCGCGACGGAGGA<br>      |
| Position 732-738 of AKT2 3' UTR | 5' ... GGGGCCAAACCUGCCUGCCUCCC... |
| hsa-miR-650                     | 3' CAGGACUCUCGCGACGGAGGA<br>      |

**Supplementary Table 3: Expression of miR-650 in colorectal epithelial cells on microarray**

|                           | Fold (vs Normal ( <i>n</i> = 11)) | P.Value (vs Normal ( <i>n</i> = 11)) |
|---------------------------|-----------------------------------|--------------------------------------|
| Adenoma ( <i>n</i> = 23)  | 0.60                              | 0.038                                |
| Dukes' A ( <i>n</i> = 14) | 0.18                              | 0.000                                |
| Dukes' B ( <i>n</i> = 20) | 0.14                              | 0.000                                |
| Dukes' C ( <i>n</i> = 23) | 0.19                              | 0.000                                |
| Dukes' D ( <i>n</i> = 10) | 0.30                              | 0.022                                |

**Supplementary Table 4: The seed nucleotides and mutated nucleotides of AKT2**

|                    |                                                             |
|--------------------|-------------------------------------------------------------|
| 1st, 2nd Seed Wild | 5'-CCAGCGGCCCTGCAGCCCCTGCCTCCAGCCTCCAGCCTCACCTTTGTGCCAGT-3' |
| 1st Seed Mutant    | 5'-CCAGCGGCCCTGCAGCCCCTTCATCTAGCCTCCAGCCTCACCTTTGTGCCAGT-3' |
| 2nd Seed Mutant    | 5'-CCAGCGGCCCTGCAGCCCCTGCCTCCAATTTCTAGCCTCACCTTTGTGCCAGT-3' |
| 3rd Seed Wild      | 5'-CCTGGGTGTCGTGCTGGTGTCTGCCTCCGCGCTGCTGCATCTGGACGAAT-3'    |
| 4th Seed Wild      | 5'-CACATTTGGGGCCAAACCTGCCTGCCTCCCAGCCCCGTGCCTTACTAGT-3'     |

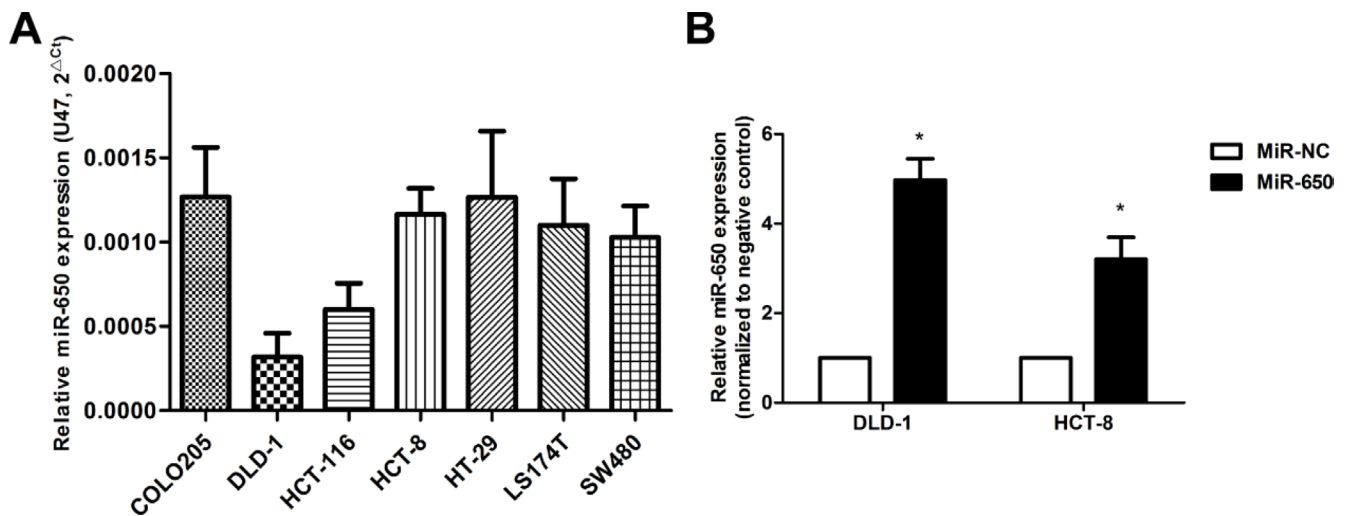

**Supplementary Figure 1: Expression levels of miR-650 in colon cancer cells.** (A) The basal expression levels in seven colon cancer cell lines. (B) Expression levels of miR-650 in DLD-1 and HCT-8 transfectants. MiR-650 precursor was transduced to DLD-1 and HCT-8 cells by lentiviral vectors. \*  $P < 0.05$ .

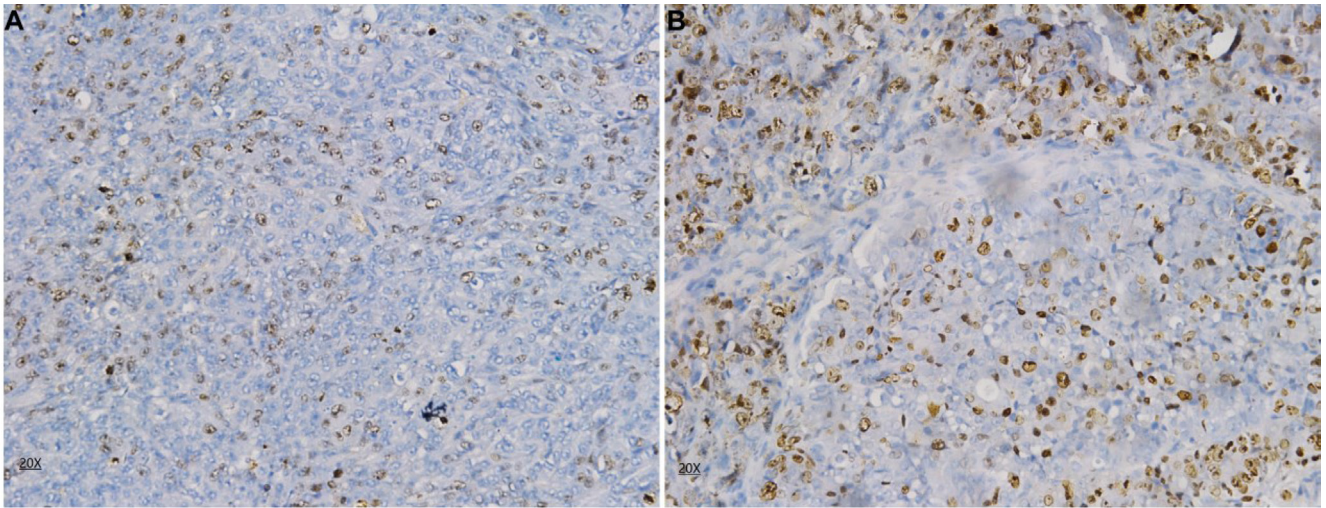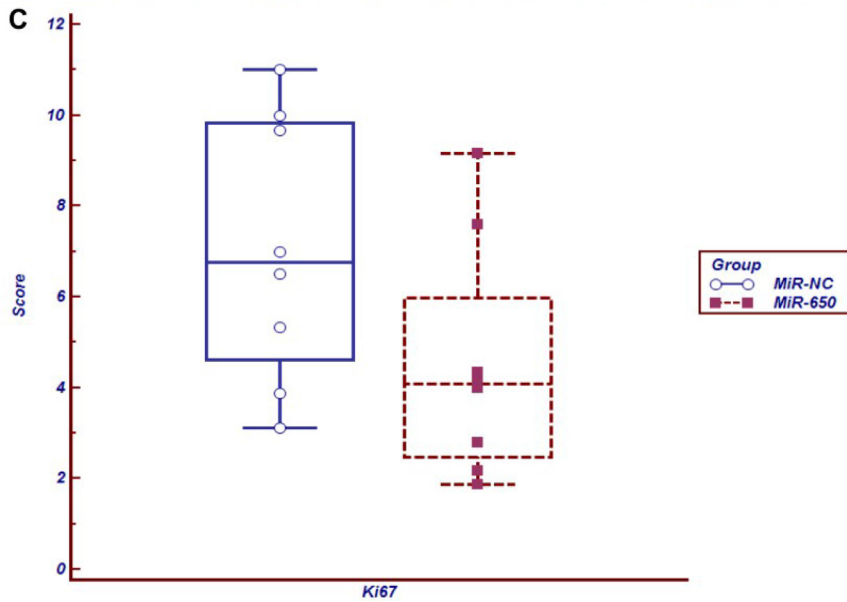

**Supplementary Figure 2: Ki-67 expression in tumor xenograft mice model.** Scores were given by two pathologists. (A) Low score of Ki-67. (B) High score of Ki-67. (C) Box-and-whisker.

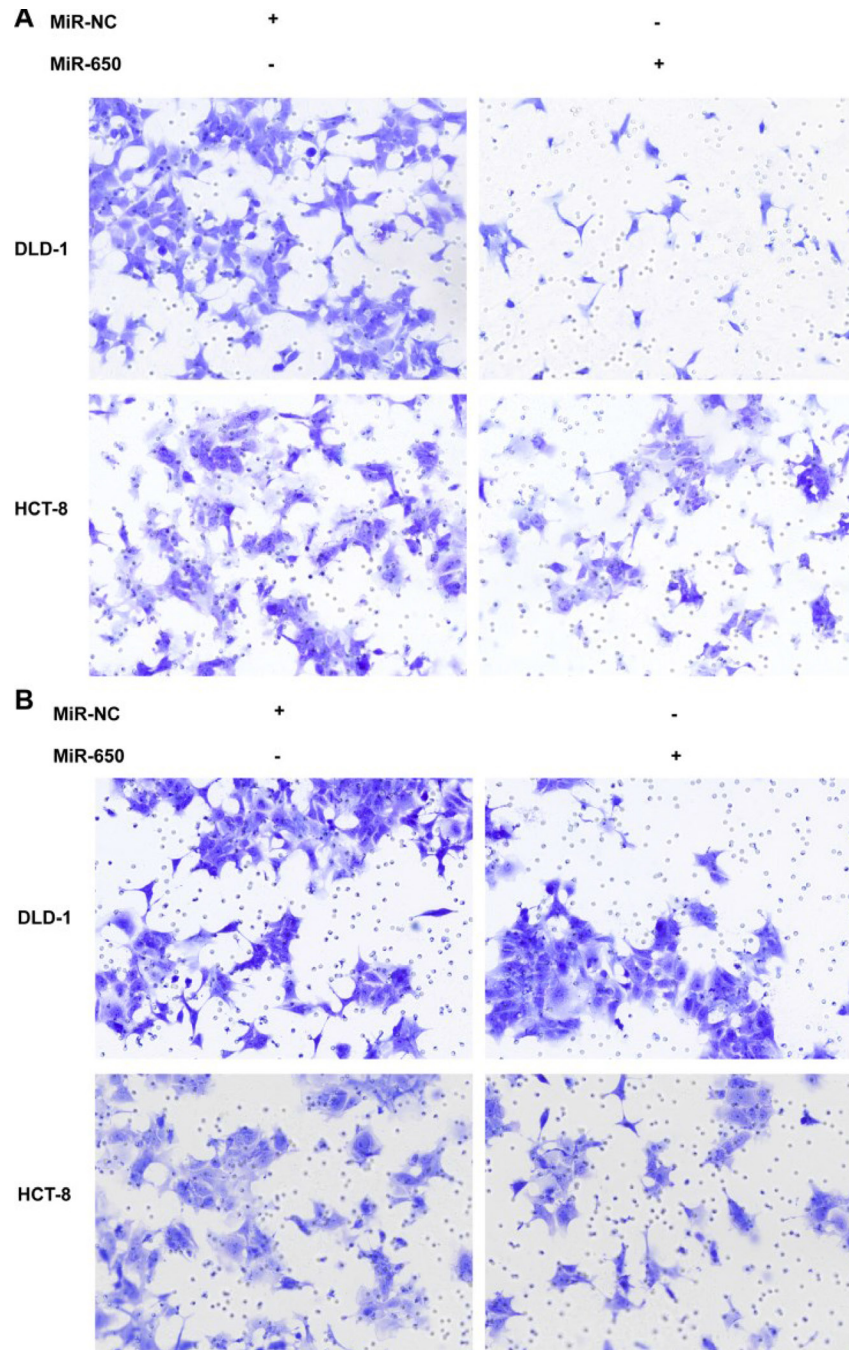

**Supplementary Figure 3: Effects of miR-650 on regulating migratory and invasive abilities in DLD-1 and HCT-8 cells (200×).** (A) Cell migratory abilities. (B) Cell invasive abilities.

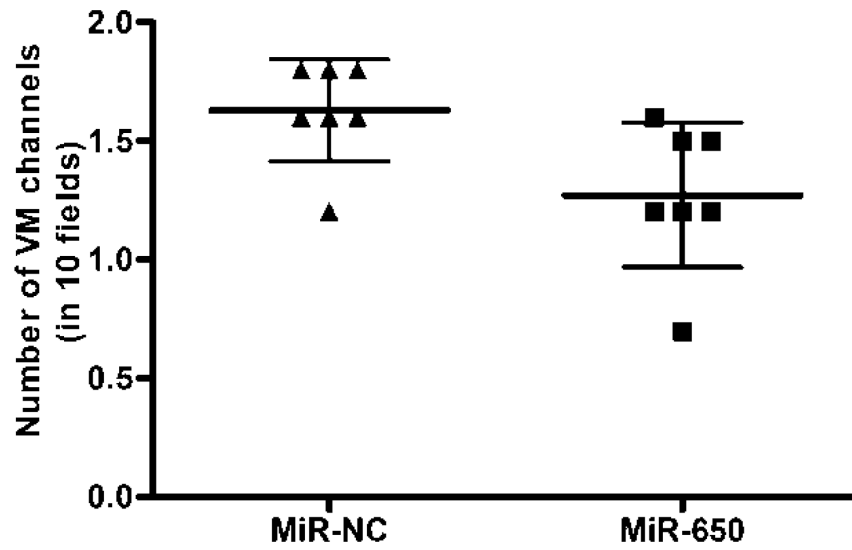

Supplementary Figure 4: Number of VM channels in xenograft mice model.

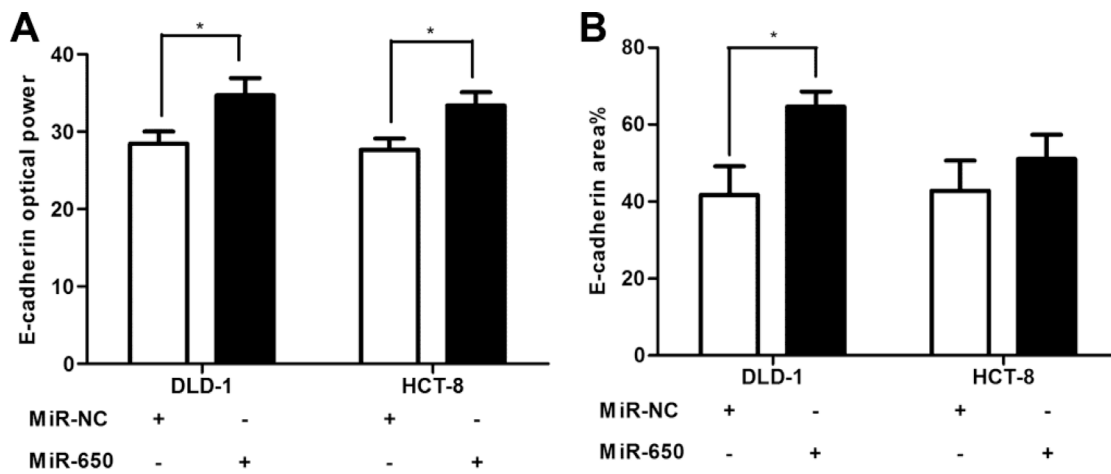

Supplementary Figure 5: Expression of E-cadherin in DLD-1 and HCT-8 cells. (A) E-cadherin optical power on cell surface. \* $P = 0.03$  in DLD-1 and \* $P = 0.02$  in HCT-8. (B) E-cadherin area% on cell surface. \* $P = 0.01$ .

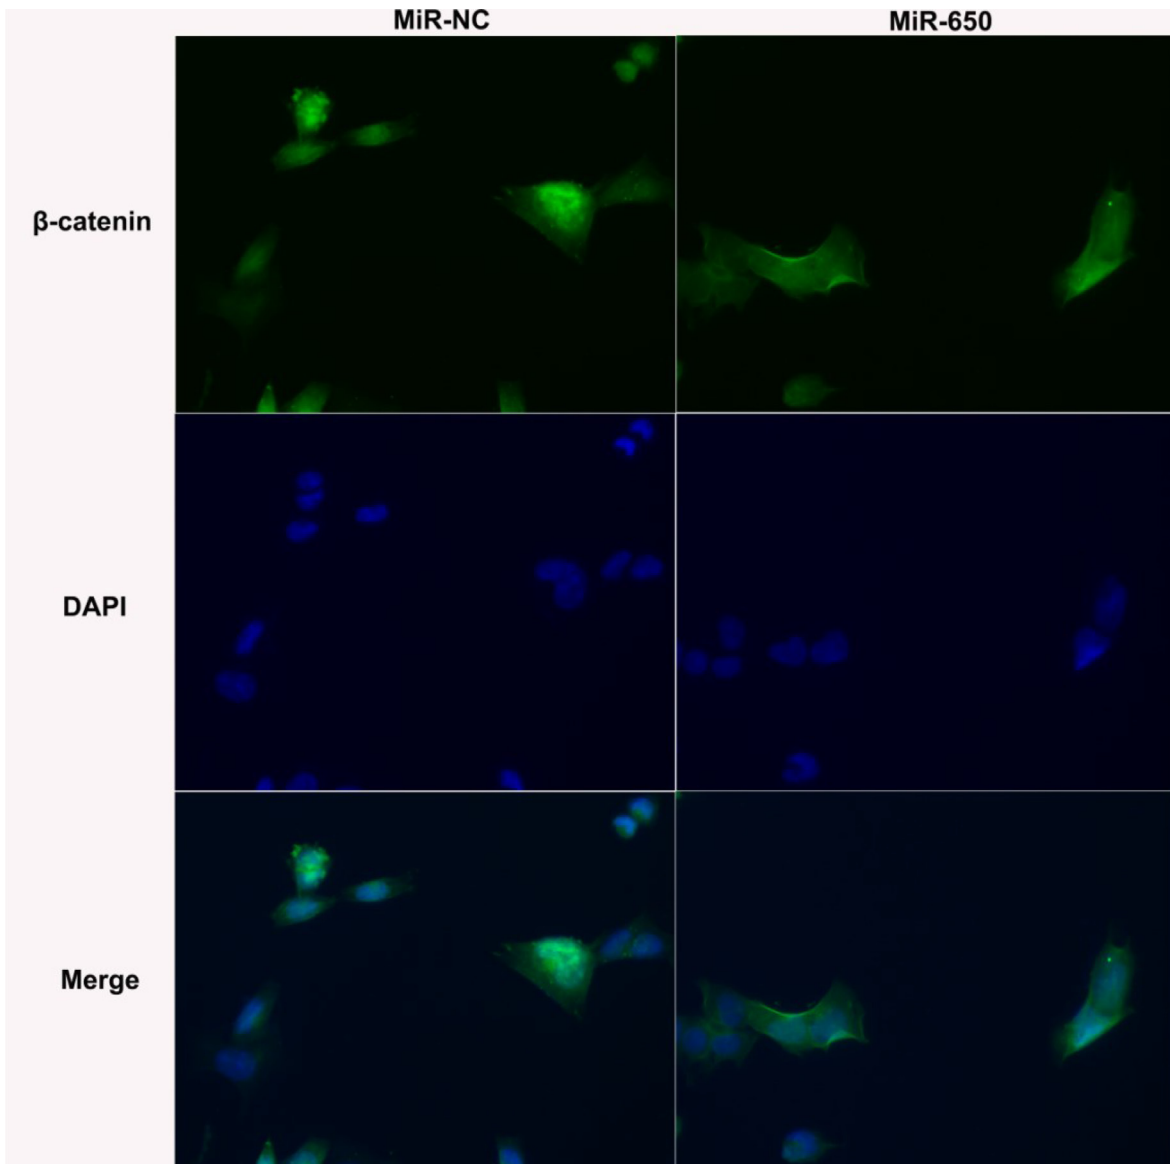

Supplementary Figure 6: Expression of  $\beta$ -catenin in DLD-1 cells.

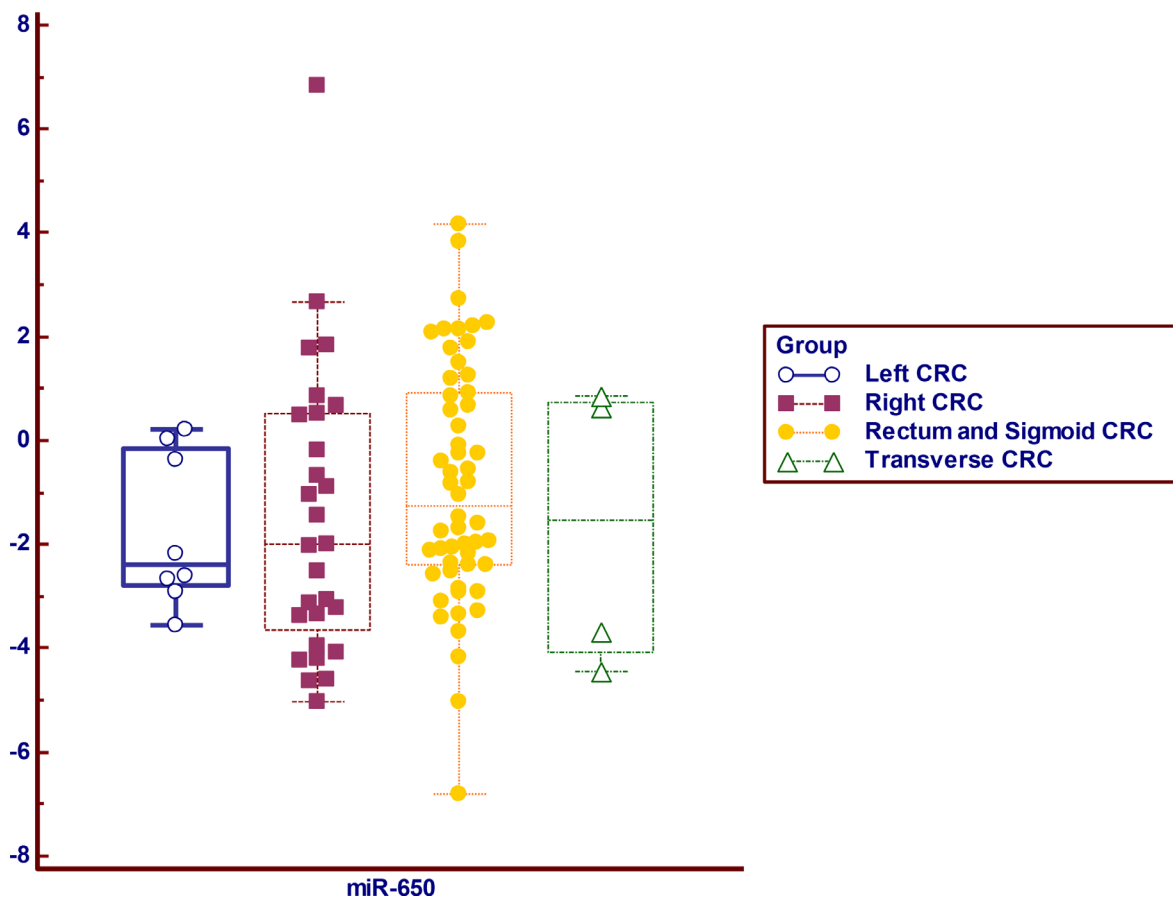

Supplementary Figure 7: MiR-650 expression in different location of CRC.
